# Supplementary material for: Iodine-131 dose-dependent gene expression: alterations in both normal and tumour thyroid tissues of post-Chernobyl thyroid cancers
Source: PubMed Central journal article supplement — Br J Cancer. 2013 Sep 17;109(8):2286–94. doi: 10.1038/bjc.2013.574 (PMC3798970; doi:10.1038/bjc.2013.574), 2013-09-17
Supplement: bjc2013574x1.pdf [file bjc2013574x1.pdf]

**Supplement table 1**

Abend et al.

| Gene (Gene ID)                                                                           | Cytoband   | Gene's function <sup>1</sup>                                                                                                                             | Gene's mechanism <sup>1</sup>                                                                                                                     | Gene RIF <sup>2</sup> and bibliography                                                                                                                                                                                                | Selected references                                                                                                  |
|------------------------------------------------------------------------------------------|------------|----------------------------------------------------------------------------------------------------------------------------------------------------------|---------------------------------------------------------------------------------------------------------------------------------------------------|---------------------------------------------------------------------------------------------------------------------------------------------------------------------------------------------------------------------------------------|----------------------------------------------------------------------------------------------------------------------|
| <b><i>regulator of proliferation and cell death</i></b>                                  |            |                                                                                                                                                          |                                                                                                                                                   |                                                                                                                                                                                                                                       |                                                                                                                      |
| signal transducer and activator of transcription 3 (acute-phase response factor) (STAT3) | 17q21.31   | plays a key role in many cellular processes such as cell growth and apoptosis                                                                            | STAT members are phosphorylated by receptor kinases, form homo-/heterodimers, translocate to the cell nucleus and act as transcription activators | impact on proliferation of breast cancer cells<br>involved in progression of human gastric cancer                                                                                                                                     | Shackelford et al., Breast Cancer Res. 2011 Jun 20;13(3):R65.<br>Hsu et al., Carcinogenesis. 2012 Aug;33(8):1459-67. |
| ankyrin repeat domain 46 (ANKRD46)                                                       | 8q22.2     | functions in protein-protein interactions in a variety of cellular processes                                                                             |                                                                                                                                                   | potential biomarkers for gastric cancer and correlation between copy number and expression<br>ANKRD46 is targeted by miR-21 and miR-21 knockdown inhibits proliferation, migration and tumor growth in human breast cancer cell lines | Cheng et al., BMC Med Genomics. 2012 May 4;5:14<br>Yan et al., Breast Cancer Res. 2011 Jan 10;13(1):R2.              |
| fibroblast growth factor receptor 1 oncogene partner 2 (FGFR1OP2)                        | 12p11.23   |                                                                                                                                                          |                                                                                                                                                   | facilitats fibroblast-driven wound closure                                                                                                                                                                                            | Lin et al., Am J Pathol. 2010 Jan;176(1):108-21.                                                                     |
| <b><i>mRNA processing and gene-environment interaction</i></b>                           |            |                                                                                                                                                          |                                                                                                                                                   |                                                                                                                                                                                                                                       |                                                                                                                      |
| heterogeneous nuclear ribonucleoprotein H1 (HNRNPH1)                                     | 5q35.3     | It is an ubiquitously expressed heterogeneous nuclear ribonucleoprotein (hnRNPs) and influences pre-mRNA processing and other aspects of mRNA metabolism |                                                                                                                                                   | Splicing factor hnRNPH drives an oncogenic splicing switch in gliomas<br>relationship of heterogeneous nuclear ribonucleoproteins with prognosis in primary and metastatic colorectal cancer                                          | Lefave et al, EMBO J. 2011 Sep 13;30(19):4084-97<br>Hope and Murray, Hum Pathol. 2011 Mar;42(3):393-402              |
| <b><i>developmental processes</i></b>                                                    |            |                                                                                                                                                          |                                                                                                                                                   |                                                                                                                                                                                                                                       |                                                                                                                      |
| hairy/enhancer-of-split related with YRPW motif 2 (HEY2)                                 | 6q21       | basic helix-loop-helix (bHLH)-type transcription factors, forms homo- or hetero-dimers and localize to the nucleus                                       | interact with a histone deacetylase complex to repress transcription, involved in Notch signal transduction pathway.                              | required for embryonic cardiovascular development, neurogenesis and somitogenesis                                                                                                                                                     |                                                                                                                      |
| ubiquitin-like modifier activating enzyme 3 (UBA3)                                       | 3p24.3-p13 | ubiquitin is an important cellular mechanism for targeting abnormal or short-lived proteins for degradation                                              | belongs to ubiquitin-activating enzyme family, associates with AppBp1, forms a heterodimer, and activates NEDD8                                   | regulates cell division, signaling and embryogenesis through activation of NEDD8                                                                                                                                                      |                                                                                                                      |

**Supplement table 1**

Abend et al.

| <i>transport of electrolytes, anions and molecules</i>                                        |         |                                                                                                                                                    |                                                                                                                     |                                                                                                                                     |                                                                                                                                           |
|-----------------------------------------------------------------------------------------------|---------|----------------------------------------------------------------------------------------------------------------------------------------------------|---------------------------------------------------------------------------------------------------------------------|-------------------------------------------------------------------------------------------------------------------------------------|-------------------------------------------------------------------------------------------------------------------------------------------|
| Rh-related antigen, integrin-associated signal transducer (Cd47)                              | 11q21   | membrane protein, which is involved in the increase in intracellular calcium concentration that occurs upon cell adhesion to extracellular matrix. | encoded protein is also a receptor for the C-terminal cell binding domain of thrombospondin and blocks phagocytosis | CD47 is a commonly expressed molecule on all cancers, it blocks tumor cell phagocytosis                                             | Willingham et al., Proc Natl Acad Sci U S A. 2012 Apr 24;109(17):6662-7                                                                   |
| ATP-binding cassette, sub-family C (ABCC3)                                                    | 17q22   | probably transport of intestinal excretion of organic anions                                                                                       | member of the MRP subfamily which is involved in multi-drug resistance.                                             | involved in stem cell-derived retinal pigment epithelial cells (hESC-RPE) maturation. impact on survival of neuroblastoma patients. | Juuti-Uusitalo et al., PLoS One. 2012;7(1):e30089. Epub 2012 Jan 17.<br>Henderson et al., J Natl Cancer Inst. 2011 Aug 17;103(16):1236-51 |
| NADPH dependent diflavin oxidoreductase 1 (NDOR1)                                             | 9q34.3  | protein catalyzes the transfer of electrons from NADPH through FAD and FMN cofactors to potential redox partners.                                  |                                                                                                                     |                                                                                                                                     |                                                                                                                                           |
| <i>less characterized genes</i>                                                               |         |                                                                                                                                                    |                                                                                                                     |                                                                                                                                     |                                                                                                                                           |
| sciellin (SCEL)                                                                               | 13q22   | precursor to the cornified envelope of terminally differentiated keratinocytes                                                                     | may function in the assembly or regulation of proteins in the cornified envelope                                    |                                                                                                                                     |                                                                                                                                           |
| chromosome 6 open reading frame 62, (C6orf62)                                                 | 6p22.3  | protein coding                                                                                                                                     |                                                                                                                     |                                                                                                                                     |                                                                                                                                           |
| chromosome 1 open reading frame 9, SUN domain containing ossification factor(SUCO ), (C1ORF9) | 1q24    | protein coding                                                                                                                                     |                                                                                                                     |                                                                                                                                     |                                                                                                                                           |
| serpin peptidase inhibitor, clade A ( SERPINA1 )                                              | 14q32.1 | The serine protease inhibitor targets elastase, plasmin, thrombin, trypsin, chymotrypsin, and plasminogen activator.                               | serine protease inhibitor                                                                                           |                                                                                                                                     |                                                                                                                                           |

<sup>1</sup>Gene description and mechanism of action as defined in NCBI Entrez Gene, April 2013. <sup>2</sup>Based on review of Gene References Into Functions (RIF) and NCBI bibliography as well as additional literature searches in PubMed focusing on reports of thyroid cancer or cancer-related biological processes.
